# Supplementary material for: Computational and Transcriptomic Analysis Unraveled OsMATE34 as a Putative Anthocyanin Transporter in Black Rice (Oryza sativa L.) Caryopsis
Source: MDPI journal article supplement (doi:10.3390/genes12040583), 2021-04-16
Supplement: s1 [file s1]

**Table S1.** Primers used for RT-qPCR analysis.

| <b>Gene</b>      | <b>transcript ID</b> | <b>Forward primer</b>  | <b>Reverse primer</b>  |
|------------------|----------------------|------------------------|------------------------|
| <i>OsMRP15</i>   | <i>OS06T0158900</i>  | GATACAATCTAGACCCCCTTG  | CAACAAGTGAATCCAATCCCTG |
| <i>OsGSTU34</i>  | <i>OS10T0395400</i>  | GATGAGCCCGTTCACGAT     | AACTTGTCATCTATGTAGGCGG |
| <i>OsMATE3</i>   | <i>OS01T0766000</i>  | TGGCTTGCTCTGCTCTATATG  | GATGAGGAACTGGAAGATCTCC |
| <i>OsMATE34</i>  | <i>OS08T0562800</i>  | GAGTTGCACTTCAAACACTCAT | CTCCTTGTAAGAGAGGTTTGGT |
| <i>OsActin-1</i> | <i>Os03T0718100</i>  | GAGTATGATGAGTCGGGTCCAG | ACACCAACAATCCCAAACAGAG |

**Table S2.** Physiochemical property of MATE proteins.

| Plant species               | gene          | Accession No / ID /AGI code | Chr | Exon count | MW (KDa) | A.A | PI   | AI     | II    | GRAVY |
|-----------------------------|---------------|-----------------------------|-----|------------|----------|-----|------|--------|-------|-------|
| <i>Vitis vinifera</i>       | VvMate1       | XP_002282932.1              | 12  | 8          | 54.90    | 504 | 8.38 | 127.72 | 24.67 | 0.809 |
| <i>Vitis vinifera</i>       | VvMATE2       | XP_002282907.1              | 12  | 8          | 54.41    | 506 | 6.99 | 133.95 | 23.91 | 0.887 |
| <i>Medicago truncatula</i>  | MtMATE1       | ACX37118.1                  | 5   | 9          | 54.89    | 504 | 6.50 | 128.85 | 23.53 | 0.859 |
| <i>Brassica rapa</i>        | BrTT12        | ACJ36213.1                  | 7   | 8          | 55.17    | 507 | 8.36 | 124.02 | 28.40 | 0.752 |
| <i>Arabidopsis thaliana</i> | AtTT12        | At3g59030.1                 | 3   | 8          | 55.15    | 507 | 8.36 | 120.18 | 30.21 | 0.745 |
| <i>Fragaria ananassa</i>    | FaTT12        | AUA60209.1                  |     |            | 55.01    | 506 | 5.51 | 126.01 | 27.69 | 0.806 |
| <i>Malus domestica</i>      | MdMATE1       | ADO22709.1/<br>GU064953.1   | 9   | 7          | 55.12    | 505 | 6.52 | 125.70 | 25.28 | 0.799 |
| <i>Malus domestica</i>      | MdMATE2       | ADO22711.1/<br>GU064955     | 17  | 7          | 55.97    | 514 | 6.99 | 123.72 | 24.37 | 0.761 |
| <i>Oryza sativa</i>         | OsMATE55      | LOC_Os12g42130.1            | 12  | 8          | 54.10    | 500 | 6.32 | 128.36 | 25.35 | 0.848 |
| <i>Oryza sativa</i>         | OsMATE15      | LOC_Os03g37640.1            | 3   | 7          | 53.62    | 500 | 6.52 | 119    | 32.30 | 0.763 |
| <i>Oryza sativa</i>         | OsMATE13      | LOC_Os03g37470.1            | 3   | 6          | 37.35    | 350 | 7.52 | 120.97 | 23.60 | 0.881 |
| <i>Raphanus sativus</i>     | RsMATE2       | MF360948                    | 5   | 7          | 55.04    | 505 | 5.18 | 117.80 | 27.62 | 0.708 |
| <i>Oryza sativa</i>         | OsMATE14      | LOC_Os03g37490.1            | 3   | 7          | 55.79    | 520 | 5.24 | 114.21 | 30.58 | 0.731 |
| <i>Oryza sativa</i>         | OsMATE12      | LOC_Os03g37411.1            | 3   | 7          | 53.84    | 500 | 6.98 | 114.52 | 30.51 | 0.702 |
| <i>Oryza sativa</i>         | OsMATE34      | LOC_Os08g44870.1            | 8   | 3          | 51.60    | 489 | 5.6  | 116.93 | 32.79 | 0.746 |
| <i>Oryza sativa</i>         | OsMATE7       | LOC_Os02g57570.1            | 2   | 2          | 38.74    | 363 | 4.72 | 110.06 | 32.98 | 0.528 |
| <i>Solanum lycopersicum</i> | Slmate /MTP77 | AAQ55183.1                  | 3   | 7          | 55.17    | 506 | 5.89 | 119.13 | 21.64 | 0.650 |
| <i>Medicago truncatula</i>  | MtMATE2       | ADV04045.1                  | 1   | 7          | 54.52    | 501 | 5.68 | 126.45 | 27.82 | 0.785 |
| <i>Arabidopsis thaliana</i> | AtFFT         | At4g25640                   | 4   | 7          | 53.22    | 488 | 6.13 | 120.88 | 33.84 | 0.798 |
| <i>Raphanus sativus</i>     | RsMATE8       | MF360954                    | 8   |            | 53.37    | 490 | 6.89 | 119.80 | 31.51 | 0.792 |
| <i>Vitis vinifera</i>       | VvAM3         | ACN91542.1                  | 16  | 6          | 53.85    | 493 | 6.53 | 116.06 | 28.46 | 0.678 |
| <i>Vitis vinifera</i>       | VvAM1         | ACN88706.1                  | 16  | 7          | 53.50    | 489 | 5.89 | 118.12 | 24.07 | 0.725 |
| <i>Oryza sativa</i>         | OsMATE3       | LOC_Os01g56050.1            | 1   | 8          | 51.58    | 484 | 9.58 | 119.94 | 30.64 | 0.728 |
| <i>Oryza sativa</i>         | OsMATE16      | LOC_Os03g42830.1            | 3   | 8          | 51.83    | 477 | 8.93 | 117.80 | 26.65 | 0.76  |
| <i>Oryza sativa</i>         | OsMATE39      | LOC_Os10g11860.1            | 10  | 8          | 50.22    | 464 | 8.82 | 117.16 | 30.09 | 0.806 |
| <i>Raphanus sativus</i>     | RsMATE3       | MF360949                    | 3   |            | 56.48    | 519 | 5.34 | 112.76 | 27.96 | 0.812 |
| <i>Oryza sativa</i>         | OsMATE33      | LOC_Os08g43654.1            | 8   | 3          | 56.17    | 522 | 6.71 | 116.07 | 37.06 | 0.698 |
| <i>Oryza sativa</i>         | OsMATE9       | LOC_Os03g08900.1            | 3   | 8          | 52.96    | 489 | 6.97 | 117.89 | 26.69 | 0.775 |
| <i>Oryza sativa</i>         | OsMATE31      | LOC_Os08g37432.1            | 8   | 8          | 52.55    | 489 | 6.09 | 123.25 | 22.92 | 0.802 |
| <i>Oryza sativa</i>         | OsMATE35      | LOC_Os09g29284.1            | 9   | 8          | 51.97    | 482 | 9    | 117.97 | 40.07 | 0.730 |
| <i>Oryza sativa</i>         | OsMATE48      | LOC_Os11g03484.1            | 11  | 4          | 36.14    | 329 | 5.09 | 114.98 | 38.61 | 0.652 |
| <i>Oryza sativa</i>         | OsMATE51      | LOC_Os12g03200.1            | 12  | 6          | 33.89    | 311 | 5.08 | 116.62 | 39.96 | 0.648 |
| <i>Oryza sativa</i>         | OsMATE47      | LOC_Os11g03240.1            | 11  | 8          | 54.68    | 497 | 6.36 | 117.89 | 38.93 | 0.689 |
| <i>Oryza sativa</i>         | OsMATE 52     | LOC_Os12g03230.1            | 12  | 7          | 54.68    | 497 | 6.36 | 117    | 38.93 | 0.689 |
| <i>Oryza sativa</i>         | OsMATE49      | LOC_Os11g03500.1            | 11  | 9          | 54.24    | 495 | 6.33 | 115.78 | 32.01 | 0.606 |
| <i>Oryza sativa</i>         | OsMATE53      | LOC_Os12g03260.1            | 12  | 8          | 55.44    | 507 | 6.01 | 116.13 | 30.83 | 0.615 |
| <i>Arabidopsis thaliana</i> | AtFRD3        | At3g08040                   | 3   | 12         | 55.95    | 526 | 9.63 | 114.70 | 29.83 | 0.613 |
| <i>Raphanus sativus</i>     | RsMATE7       | MF360953                    | 7   |            | 48.11    | 451 | 5.9  | 117.07 | 36.64 | 0.598 |

The MATE transporter genes were denominated systematically based on their physical locations on the chromosomes of rice. The MW (Molecular weight in kiloDaltons), A.A (Number of amino acids), PI (isoelectric point), AI (aliphatic index), II (instability index), and GRAVY (GRAND average of Hydropathicity Index) were computed using the ExPASy Compute pI/ Mw tool ([http:// web.expasy.org/cgi-bin/protparam](http://web.expasy.org/cgi-bin/protparam); accessed on 30 August 2020).

Table S3: The Differentially conserved motif of MATE gene family

| <b>MOTIF</b>   | <b>PROTEIN SEQUENCE</b>                            | <b>LENGHT</b> |
|----------------|----------------------------------------------------|---------------|
| <b>MEME-1</b>  | PLLAITILLNSIQPVLSGVAVGSGWQALVAYVNLGCYYJIGJPJGCLLGF | 50            |
| <b>MEME-2</b>  | GFAYGIMLGMASALETLCGQAYGAKQYHMLGVYLQRS              | 37            |
| <b>MEME-3</b>  | CKETWTGFSWKAFTGJWAFVKLSLASAVMLCLEJWYNQILVLJTGLLKNA | 50            |
| <b>MEME-4</b>  | EIALDSJSICMNINGWEMMISLGFNAAISVRVSNELGAGHPRAAKFSVFV | 50            |
| <b>MEME-5</b>  | KGIWWGMIIGTLLQTLILLFJTARTBWNKEVEEASERLKKW          | 41            |
| <b>MEME-6</b>  | IAAAAGTFALGLIPQJFAYAINFPLQKFLQAQSKVNPLAYI          | 41            |
| <b>MEME-7</b>  | YGLSFVTQAFVGHJGALELAAASJASTVIQ                     | 30            |
| <b>MEME-8</b>  | JLLPJYWFATPJLIALGQSPE                              | 21            |
| <b>MEME-9</b>  | RDYLAYJFTSDKEVIDAVSDL                              | 21            |
| <b>MEME-10</b> | HVLLSWLVVYVLGLGLLGAAL                              | 21            |
| <b>MEME-11</b> | RLVAWESKKLWRIAGPSIFVS                              | 21            |
| <b>MEME-12</b> | TLSFSWWJJVAAQLAYIVFSP                              | 22            |

**Table S4.** Similarity index and identity.

| OsMATE    | OTHER MATE    | Similarity index | IDENTITY |
|-----------|---------------|------------------|----------|
| OsMATE 34 | MTP77/ SIMATE | 51               | 52.74    |
|           | MtMATE2       | 51               | 52.67    |
|           | AtFFT         | 55               | 56.99    |
|           | RsMATE8       | 54               | 55.21    |
|           | VvAM3         | 54               | 54.56    |
|           | VvAM1         | 54               | 52.51    |
|           | RsMATE3       | 42               | 44.77    |
| OsMATE 7  | MTP77         | 41               | 59.68    |
|           | MtMATE2       | 39               | 56.23    |
|           | AtFFT         | 42               | 61.39    |
|           | RsMATE8       | 42               | 60.66    |
|           | VvAM3         | 39               | 57.19    |
|           | VvAM1         | 39               | 57.52    |
|           | RsMATE3       | 31               | 43.41    |
| OsMATE33  | RsMATE3       | 50               | 50.97    |
|           | MTP77/ SIMATE | 44               | 46.04    |
|           | MtMATE2       | 46               | 47.37    |
|           | AtFFT         | 44               | 47.63    |
|           | RsMATE8       | 45               | 47.23    |
|           | VvAM3         | 44               | 45.92    |
|           | VvAM1         | 44               | 46.31    |
| OsMATE39  | RsMATE3       | 46               | 47.08    |
|           | MTP77/ SIMATE | 41               | 41.34    |
|           | MtMATE2       | 41               | 41.99    |
|           | AtFFT         | 40               | 41.34    |
|           | RsMATE8       | 40               | 40.69    |
|           | VvAM3         | 41               | 41.34    |
|           | VvAM1         | 41               | 40.91    |
| OsMATE16  | RsMATE3       | 51               | 50.22    |
|           | MTP77/ SIMATE | 44               | 44.73    |
|           | MtMATE2       | 45               | 45.49    |
|           | AtFFT         | 46               | 47.20    |
|           | RsMATE8       | 46               | 46.34    |
|           | VvAM3         | 46               | 46.02    |
|           | VvAM1         | 46               | 45.24    |
| OsMATE 3  | RsMATE3       | 47               | 51.58    |
|           | MTP77/ SIMATE | 44               | 46.51    |
|           | MtMATE2       | 42               | 45.03    |
|           | AtFFT         | 43               | 47.45    |
|           | RsMATE8       | 44               | 46.07    |
|           | VvAM3         | 43               | 45.24    |
|           | VvAM1         | 43               | 44.26    |

Sequence identity was analyzed using Clustal Omega multiple sequence analysis  
<https://www.ebi.ac.uk/Tools/msa/clustalo/>; accessed on 21 August 2020

**Table S5:** The basic information about MATE protein localization.

| Proteins     | plas | vacu | ER | GOLG | Cyto | chlo | mito |
|--------------|------|------|----|------|------|------|------|
| VvMate1 T12  | 6    | 4    |    | 3    | 1    |      |      |
| VvMATE2      | 2    | 9    |    | 3    |      |      |      |
| MtMATE1      | 7    | 5    | 1  | 1    |      |      |      |
| BrTT12       | 8    | 3    | 1  | 2    |      |      |      |
| AtTT12       | 6    | 4    | 1  | 3    |      |      |      |
| FaTT12       | 6    | 5    | 1  | 2    |      |      |      |
| MdMATE1      | 6    | 5    |    | 3    |      |      |      |
| MdMATE2      | 6    | 4    | 1  | 3    |      |      |      |
| OsMATE55     | 7    | 4    | 1  | 2    |      |      |      |
| OsMATE15     | 6    | 4    | 2  | 2    |      |      |      |
| OsMATE13     | 4    | 10   |    |      |      |      |      |
| RsMATE2      | 7    | 4    | 1  | 2    |      |      |      |
| OsMATE14     | 6    | 4    | 1  | 2    | 1    |      |      |
| OsMATE12     | 8    | 3    | 2  | 1    |      |      |      |
| OsMATE34     | 6    | 5    | 1  | 1    | 1    |      |      |
| OsMATE7      | 6.5  | 1    | 4  |      | 4    | 1    | 1    |
| SIMATE/MTP77 | 9    | 4    | 1  |      |      |      |      |
| MtMATE2      | 9    | 4    | 1  |      |      |      |      |
| AtFFT        | 13   | 1    |    |      |      |      |      |
| RsMATE8      | 8    | 2    | 1  | 3    |      |      |      |
| VvAM3        | 6    | 4    | 1  | 3    |      |      |      |
| VvAM1        | 9    | 2    | 1  | 2    |      |      |      |
| OSMATE3      | 11   | 1    | 1  |      |      | 1    |      |
| OSMATE16     | 1    | 10   |    | 2    | 1    |      |      |
| OSMATE39     | 6    | 6    |    | 1    | 1    |      |      |
| RsMATE3      | 7    | 4    |    | 3    |      |      |      |
| OsMATE33     | 12   | 2    |    |      |      |      |      |
| OSMATE9      | 9    | 4    | 1  |      |      |      |      |
| OsMATE31     | 11   | 1    | 2  |      |      |      |      |
| OSMATE35     | 3    | 6    | 1  | 3    | 1    |      |      |
| OSMATE48     | 10   | 1    | 2  |      | 1    |      |      |
| OSMATE51     | 9    | 2    | 2  |      | 1    |      |      |
| OsMATE47     | 11   | 1    | 2  |      |      |      |      |
| OsMATE52     | 11   | 1    | 2  |      |      |      |      |
| OsMATE49     | 11   | 1    | 2  |      |      |      |      |
| OsMATE53     | 13   | 1    |    |      |      |      |      |
| AtFRD3       | 3    | 8    |    | 2    | 1    |      |      |
| RsMATE7      | 5    | 4    | 3  |      |      | 2    |      |

Subcellular localization prediction using <https://wolfsort.hgc.jp/>; accessed on 8 September 2021. plas, vacu, ER, Golg, Cyto, Chlo, mito represent respectively plasma membrane protein, vacuole, endoplasmic reticulum, golgi apparatus, chloroplast and mitochondria.

**Table S6:** Expression pattern of anthocyanin biosynthesis and transporter genes based on fold-change levels in Bc and Wc.

| gene groups                  | gene_ID                      | Gene name               | Log2FC    | Log2FC    | Log2FC    |
|------------------------------|------------------------------|-------------------------|-----------|-----------|-----------|
|                              |                              |                         | Bc11/Wc11 | Bc18/Wc18 | Bc25/Wc25 |
| <b>Transporter genes</b>     | Os06g0158900                 | OsABCC15/<br>MRP15      | 5.29***   | -1.19***  | -0.35*    |
|                              | Os10g0395400                 | OsGSTU34/GST            | 9.37***   | 12.47***  | 9.57***   |
|                              | <a href="#">Os01g0766000</a> | OsMate3                 | -1.49*    | -0.78*    | -0.32*    |
|                              | <a href="#">Os02g0821600</a> | Mate7                   | -0.95*    | 0.00      | 0.00      |
|                              | <a href="#">Os03g0626700</a> | Mate16                  | 4.29*     | 0.57*     | 0.55*     |
|                              | <a href="#">Os08g0550200</a> | Mate 33                 | 0.00      | -3.97*    | -2.28*    |
|                              | <a href="#">Os08g0562800</a> | Mate 34                 | 9.21***   | 6.43***   | 3.98***   |
|                              | <a href="#">Os10g0195000</a> | OsSTA240/<br>MATE39     | 0.00      | -3.23*    | -3.81***  |
| <b>Phenylalanine pathway</b> | Os02g0627100                 | OsPAL1/ OsPAL           | 7.12 ***  | 2.81 ***  | 2.01 ***  |
|                              | Os05g0320700                 | C4H2/ OsC4H             | 2.90 ***  | 2.99 ***  | 1.24 *    |
|                              | Os02g0177600                 | 4CL3/Os4CL              | 3.78 ***  | 2.49 ***  | 1.30 *    |
| <b>Structural genes</b>      | Os11g0530600                 | CHS/ OsCHS              | 9.20 ***  | 9.33 ***  | 7.21 ***  |
|                              | Os03g0819600                 | gh1/ OsCHI              | 4.58 ***  | 2.23 ***  | 1.76 ***  |
|                              | Os04g0662600                 | OsF3H-1/OsF3H           | 7.37 ***  | 8.71 ***  | 7.16 ***  |
| <b>Anthocyanin pathway</b>   | Os10g0320100                 | OsF3'H                  | 8.09 ***  | 8.38 ***  | 7.59 ***  |
|                              | Os03g0367200                 | OsCYP75A11/<br>OsF3'5'H | 0.00      | 2.17 *    | 4.15 *    |
|                              | Os01g0633500                 | Rd/OsDFR                | 9.49 ***  | 11.65 *** | 11.76 *** |
| <b>Structural genes</b>      | Os01g0372500                 | OsANS                   | 10.06 *** | 11.58 *** | 5.59 ***  |
|                              | Os03g0259400                 | OsLAR                   | 5.75 *    | 2.43 *    | 3.20 ***  |
|                              | Os04g0630800                 | OsANR                   | -0.05 *   | 1.18 *    | 2.38 ***  |
| <b>Decorating genes</b>      | Os06g0192100                 | UGT/Os3GT               | 3.62 ***  | 5.25***   | 2.44 ***  |
|                              | Os08g0157500                 | ROMT9/Os3'MT            | 0.57 *    | 0.05 *    | 0.63 *    |
|                              | Os04g0557800                 | PI/OSB1                 | 0.00      | -4.04 *   | -2.23 *   |
| <b>Regulatory genes</b>      | Os04g0557500                 | Kala4/OSB2              | 8.65 ***  | 10.59 *** | 9.98 ***  |
|                              | Os06g0205100                 | C/OsCI                  | 0.00      | 0.00      | -1.23 *   |
|                              | Os03g0410000                 | OsMyb3/Kala 3           | 3.94 *    | 5.06 ***  | 4.18 ***  |
|                              | Os02g0682500                 | OsWD40-50<br>/OsWD40    | 0.99 *    | 3.69 ***  | 2.26 ***  |

(\*\*\*) The difference is significant between black and white caryopsis; (\*) the difference is not significant between black and white caryopsis; The fold change with positive and negative values represents upregulated and downregulated genes.

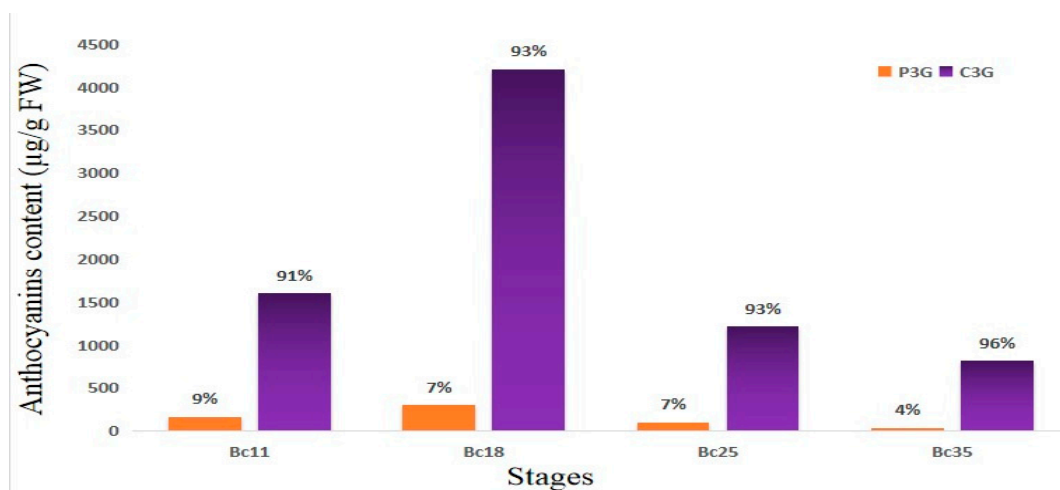

**Figure S1.** Anthocyanin quantification in black rice caryopsis at different stages; FW, fresh weight; Bc, Black caryopsis; the numbers after Bc in the graph represent days after flowering; P3G, Peonidin-3-O-glucoside in orange bar; C3G, cyanidin-3-O-glucoside; DAF, days after flowering; the number above each bar represents the relative percentage of C3G and P3G in TAC.



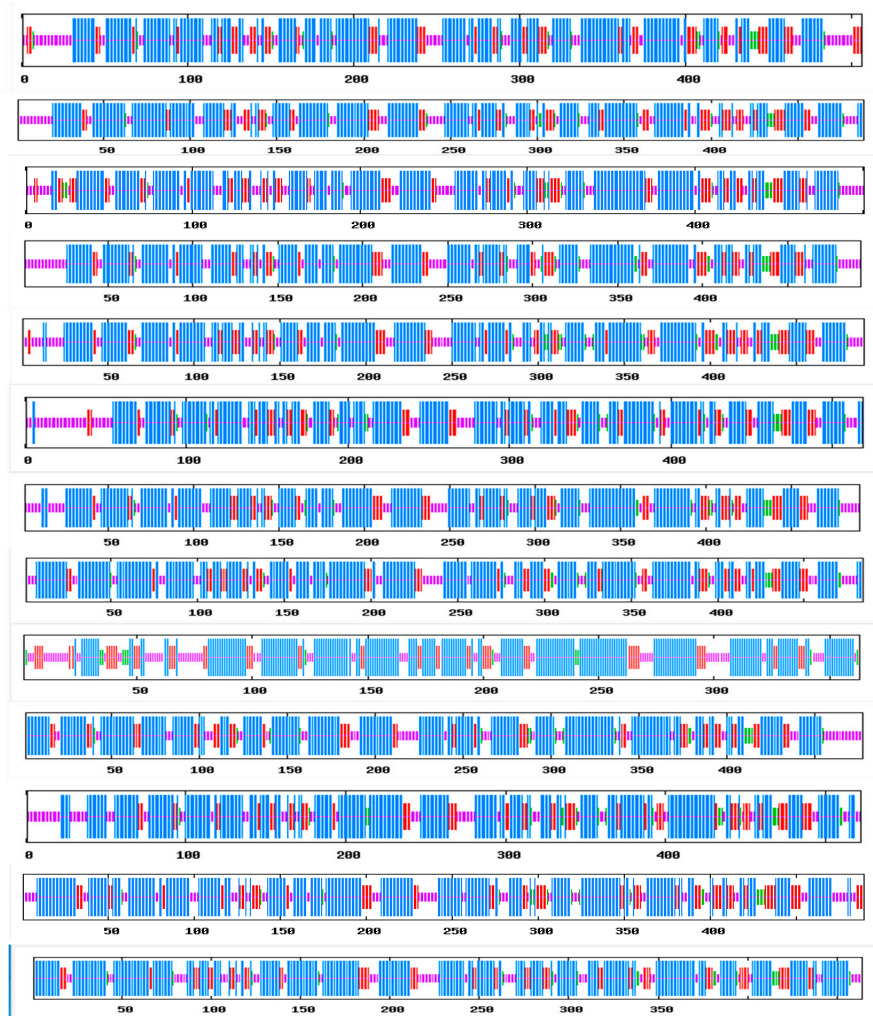

**Figure S2.** Secondary structures of the 6 rice MATEs proteins and 7 anthocyanin MATEs-like proteins predicted by SOPMA. The  $\alpha$ -helix, extended strand,  $\beta$ -turn, and random coil are denoted as the longest (blue), medium long (dark red), short (green), and the shortest (pink) vertical bars, respectively.

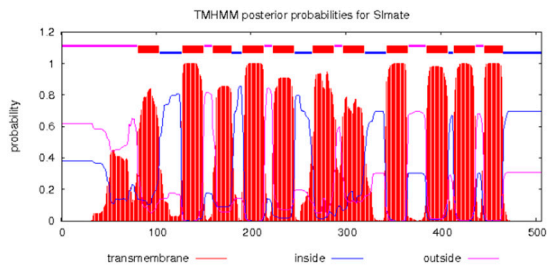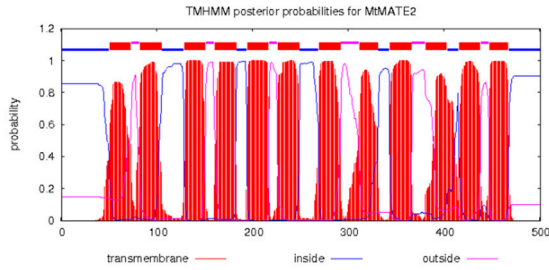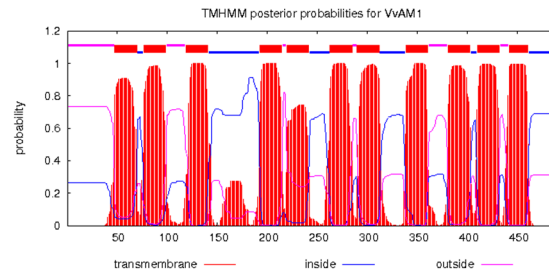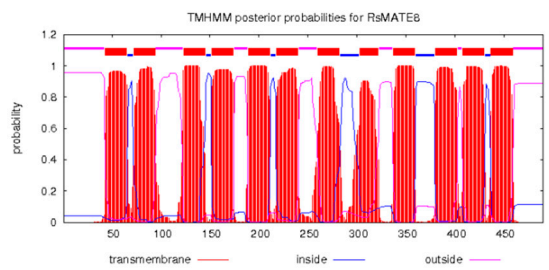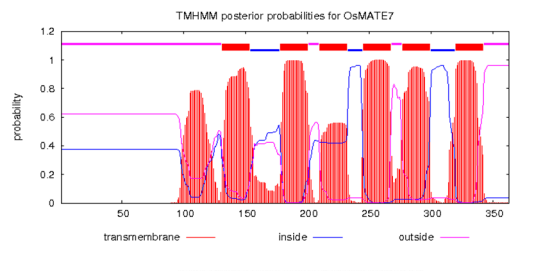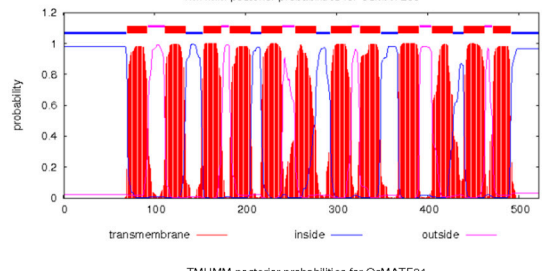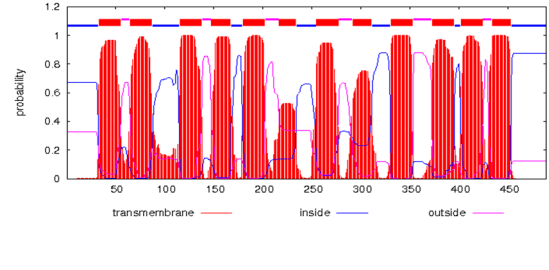

1e

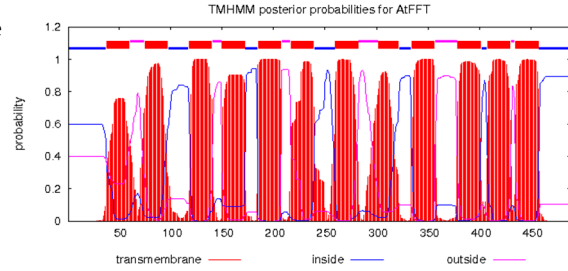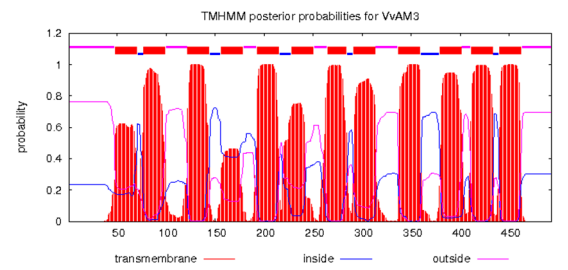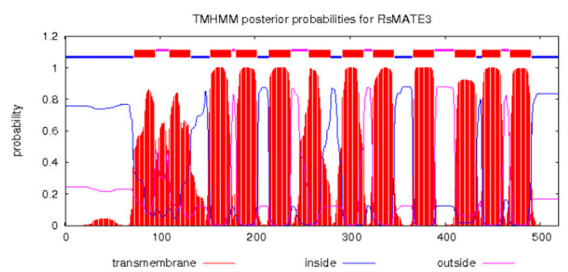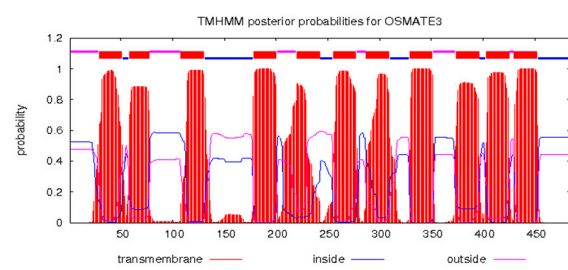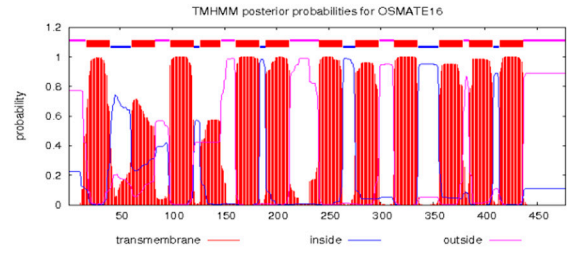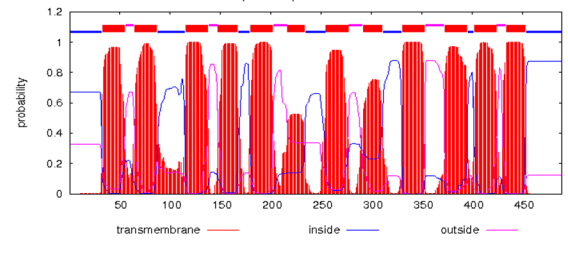

rmind

using the TMHMM2 program.

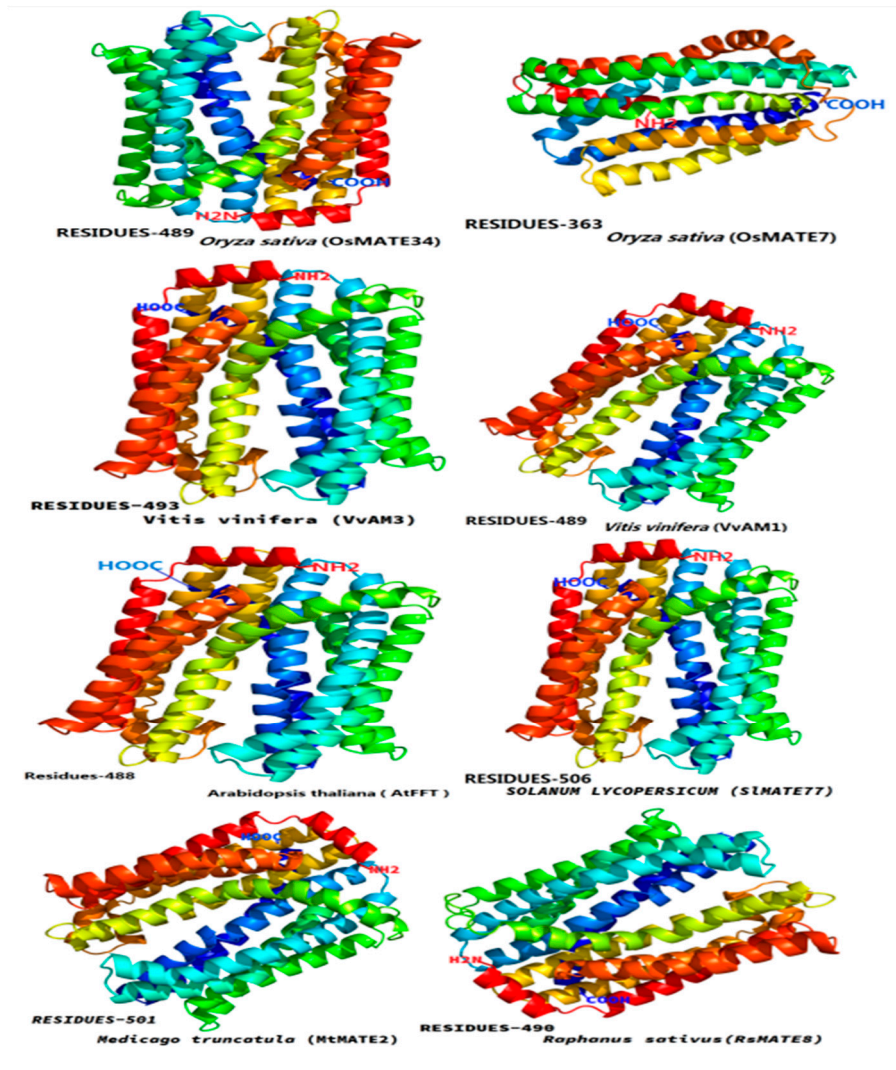

**Figure S4.** Comparison of the three-dimensional configuration of two putative OsMATEs and six anthoMATEs.
