# Supplementary material for: Computational and Transcriptomic Analysis Unraveled OsMATE34 as a Putative Anthocyanin Transporter in Black Rice (Oryza sativa L.) Caryopsis
Source: Genes (Basel). 2021 Apr 16;12(4):583. doi: 10.3390/genes12040583 (PMC8073145; doi:10.3390/genes12040583)
Supplement: Supplementary file 1 [file genes-12-00583-s001.zip]

Archive with 4 entries (4 files):
- genes supplementary Table and Figure.pdf
- supplementary file 2.xlsx
- Supplementary file 3.pdf
- Supplementary file1.xlsx
