# Supplementary material for: Computational and Transcriptomic Analysis Unraveled OsMATE34 as a Putative Anthocyanin Transporter in Black Rice (Oryza sativa L.) Caryopsis
Source: Genes (Basel). 2021 Apr 16;12(4):583. doi: 10.3390/genes12040583 (PMC8073145; doi:10.3390/genes12040583)
Supplement: Supplementary file 1 [file genes-12-00583-s001.zip › supplementary file 2.xlsx]

## Sheet: DEG REGULATION
gene groups		Gene name	Wc11 vs Bc11		Wc18 vs Bc18		Wc25vsBc25		description
Transporters genes	gene_id	Gene name	differentially Regulation pattern	Log2FC (Bc11/Wc11)	differentially Regulation pattern	Log2FC (Bc18/Wc18)	differentially Regulation pattern	Log2FC (Bc25/Wc25)
	Os06g0158900	OsABCC15/MRP15	Yes/up	5.28925	Yes/down	-1.19025	No/down	-0.352936	Similar to Multidrug-resistance associated protein 3
	Os10g0395400	OsGSTU34/GST	Yes/up	9.36777	Yes/up	12.4653	Yes/up	9.57151	Thioredoxin fold domain containing protein
	Os01g0766000	OsMate3	No/down	-1.4854	No/down	-0.782898	No/down	-0.317984	Multi antimicrobial extrusion protein MatE family protein
	Os02g0821600	Mate7	No/down	-0.949551	-	0	-	0	Similar to mate efflux family protein
	Os03g0626700	Mate16	No/up	4.29488	No/up	0.570007	No/up	0.547182	Multi antimicrobial extrusion protein MatE family protein
	Os08g0550200	Mate 33	-	0	No/down	-3.97285	No/down	-2.28169	Multi antimicrobial extrusion protein MatE family protein
	Os08g0562800	Mate 34	Yes/up	9.20897	Yes/up	6.43154	Yes/up	3.98434	Similar to Transparent testa 12 protein
	Os10g0195000	OsSTA240/ MATE39	-	0	No/down	-3.23349	Yes/down	-3.81269	Multi antimicrobial extrusion protein MatE family protein
Phenylalanine pathway Structural gene	Os02g0627100	OsPAL1/ OsPAL	Yes/up	7.12391	Yes/up	2.81087	Yes/up	2.00567	Similar to Phenylalanine ammonia-lyase (EC 4.3.1.5)
	Os05g0320700	C4H2/ OsC4H	Yes/up	2.90024	Yes/up	2.9919	No/up	1.23986	Similar to Cytochrome P450
	Os02g0177600	4CL3/Os4CL	Yes/up	3.77636	Yes/up	2.48893	No/up	1.30174	4-coumarate:coenzyme A ligase, Lignin biosynthesis, Defense against woundin
Anthocyanin pathway Structural gene	Os11g0530600	CHS/ OsCHS	Yes/up	9.20267	Yes/up	9.32881	Yes/up	7.2124	Similar to Chalcone synthase C2 (EC 2.3.1.74) (Naringenin-chalcone synthase C2)
	Os03g0819600	gh1/ OsCHI	Yes/up	4.57784	Yes/up	2.23402	Yes/up	1.76336	Chalcone isomerase (EC 5.5.1.6)
	Os04g0662600	OsF3H-1/OsF3H	Yes/up	7.37034	Yes/up	8.70884	Yes/up	7.15789	Similar to Naringenin,2-oxoglutarate 3-dioxygenase
	Os10g0320100	OsF3’H	Yes/up	8.08703	Yes/up	8.37807	Yes/up	7.5892	Similar to Flavonoid 3'-monooxygenase (EC 1.14.13.21) (Flavonoid 3'-hydroxylase) (Cytochrome P450 75B2)
	Os03g0367200	OsCYP75A11/OsF3’5’H	-	0	No/up	2.1659	No/up	4.15215	Similar to Flavonoid 3',5'-hydroxylase (EC 1.14.13.88) (F3'5'H) (Cytochrome P450 75A2) (CYPLXXVA2) (P-450EG1)
	Os01g0633500	Rd/OsDFR	Yes/up	9.4913	Yes/up	11.6545	Yes/up	11.7648	Dihydroflavonol-4-reductase (DFR), Proanthocyanidin synthesi
	Os01g0372500	OsANS	Yes/up	10.0592	Yes/up	11.5756	Yes/up	5.58877	Similar to Leucoanthocyanidin dioxygenase (EC 1.14.11.19) (LDOX) (Leucocyanidin oxygenase) (Leucoanthocyanidin hydroxylase)
	Os03g0259400	OsLAR	No/up	5.75069	No/up	2.42748	Yes/up	3.20481	Similar to Leucoanthocyanidin reductase (EC 1.17.1.3) (Leucocyanidin reductase)
	Os04g0630800	OsANR	No/down	-0.0534534	No/up	1.18242	Yes/up	2.38356	Similar to Anthocyanidin reductase
Decorating gene	Os06g0192100	UGT/Os3GT	Yes/up	3.61871	Yes/up	5.25186	Yes/up	2.44362	Similar to UDP-glucose flavonoid-3-O-glucosyltransferase
	Os08g0157500	ROMT9/Os3’MT	No/up	0.574856	No/up	0.0502506	No/up	0.632226	Caffeic acid O-methyltransferase, Flavonoid 3'-O-methyltransferase, Melatonin biosynthesis, Tricin biosynthesis
Regulatory gene	Os04g0557800	Pl/OSB1	/	0	No down	-4.03846	No/down	-2.23304	Similar to R-type basic helix-loop-helix protein
	Os04g0557500	Kala4/OSB2	Yes/up	8.64989	Yes/up	10.5909	Yes/up	9.97669	bHLH transcription factor, Homolog of the maize R/B gene, Regulation of anthocyanin pigmentatio
	Os06g0205100	C/OsC1	-	0	-	0	No/down	-1.23206	Similar to Transcriptional activator
	Os03g0410000	OsMyb3/Kala 3	No/up	3.93931	Yes/up	5.05743	Yes/up	4.18295	Conserved hypothetical protein
	Os02g0682500	OsWD40-50/OsWD40	No/up	0.991383	Yes/up	3.69003	Yes/up	2.25676	Similar to TRANSPARENT TESTA GLABRA 1 protein (TTG1 protein)
