# Supplementary material for: Computational and Transcriptomic Analysis Unraveled OsMATE34 as a Putative Anthocyanin Transporter in Black Rice (Oryza sativa L.) Caryopsis
Source: Genes (Basel). 2021 Apr 16;12(4):583. doi: 10.3390/genes12040583 (PMC8073145; doi:10.3390/genes12040583)
Supplement: Supplementary file 1 [file genes-12-00583-s001.zip › Supplementary file1.xlsx]

## Sheet: GO analysis
GO ID	Description	Term Type	Wc25_vs_Bc25 num	Wc25_vs_Bc25 percent	Wc11_vs_Bc11 num	Wc11_vs_Bc11 percent	Wc18_vs_Bc18 num	Wc18_vs_Bc18 percent
GO:0032501	multicellular organismal process	biological_process	42	42/2361	40	40/1938	101	101/4159
GO:0065007	biological regulation	biological_process	379	379/2361	339	339/1938	732	732/4159
GO:0051704	multi-organism process	biological_process	42	42/2361	26	26/1938	94	94/4159
GO:0048511	rhythmic process	biological_process	2	2/2361	1	1/1938	9	9/4159
GO:0022414	reproductive process	biological_process	56	56/2361	54	54/1938	110	110/4159
GO:0040011	locomotion	biological_process	3	3/2361	3	3/1938	6	6/4159
GO:0050896	response to stimulus	biological_process	233	233/2361	177	177/1938	409	409/4159
GO:0002376	immune system process	biological_process	9	9/2361	9	9/1938	26	26/4159
GO:0000003	reproduction	biological_process	1	1/2361	1	1/1938	5	5/4159
GO:0098754	detoxification	biological_process	23	23/2361	10	10/1938	32	32/4159
GO:0009987	cellular process	biological_process	787	787/2361	668	668/1938	1476	1476/4159
GO:0022610	biological adhesion	biological_process	0	0	0	0	1	1/4159
GO:0015976	carbon utilization	biological_process	1	1/2361	0	0	2	2/4159
GO:0001906	cell killing	biological_process	0	0	0	0	1	1/4159
GO:0051179	localization	biological_process	216	216/2361	161	161/1938	422	422/4159
GO:0032502	developmental process	biological_process	68	68/2361	71	71/1938	151	151/4159
GO:0071840	cellular component organization or biogenesis	biological_process	116	116/2361	138	138/1938	237	237/4159
GO:0019740	nitrogen utilization	biological_process	2	2/2361	1	1/1938	6	6/4159
GO:0043473	pigmentation	biological_process	1	1/2361	1	1/1938	1	1/4159
GO:0008152	metabolic process	biological_process	819	819/2361	633	633/1938	1498	1498/4159
GO:0008283	cell population proliferation	biological_process	2	2/2361	2	2/1938	1	1/4159
GO:0040007	growth	biological_process	6	6/2361	6	6/1938	16	16/4159
GO:0044425	membrane part	cellular_component	807	807/2361	542	542/1938	1465	1465/4159
GO:0005623	cell	cellular_component	18	18/2361	21	21/1938	37	37/4159
GO:0044422	organelle part	cellular_component	183	183/2361	210	210/1938	392	392/4159
GO:0032991	protein-containing complex	cellular_component	125	125/2361	159	159/1938	242	242/4159
GO:0044464	cell part	cellular_component	990	990/2361	841	841/1938	1876	1876/4159
GO:0016020	membrane	cellular_component	595	595/2361	340	340/1938	1117	1117/4159
GO:0044217	other organism part	cellular_component	4	4/2361	5	5/1938	9	9/4159
GO:0043226	organelle	cellular_component	537	537/2361	514	514/1938	1049	1049/4159
GO:0009295	nucleoid	cellular_component	2	2/2361	0	0	1	1/4159
GO:0099080	supramolecular complex	cellular_component	6	6/2361	9	9/1938	20	20/4159
GO:0031974	membrane-enclosed lumen	cellular_component	5	5/2361	11	11/1938	14	14/4159
GO:0005576	extracellular region	cellular_component	72	72/2361	56	56/1938	143	143/4159
GO:0044421	extracellular region part	cellular_component	14	14/2361	7	7/1938	19	19/4159
GO:0030054	cell junction	cellular_component	28	28/2361	12	12/1938	46	46/4159
GO:0044423	virion part	cellular_component	0	0	0	0	1	1/4159
GO:0031386	protein tag	molecular_function	1	1/2361	0	0	3	3/4159
GO:0090729	toxin activity	molecular_function	3	3/2361	4	4/1938	4	4/4159
GO:0005215	transporter activity	molecular_function	157	157/2361	92	92/1938	276	276/4159
GO:0005488	binding	molecular_function	1066	1066/2361	872	872/1938	1948	1948/4159
GO:0003824	catalytic activity	molecular_function	971	971/2361	740	740/1938	1833	1833/4159
GO:0140104	molecular carrier activity	molecular_function	0	0	1	1/1938	1	1/4159
GO:0005198	structural molecule activity	molecular_function	23	23/2361	28	28/1938	29	29/4159
GO:0098772	molecular function regulator	molecular_function	34	34/2361	36	36/1938	56	56/4159
GO:0045735	nutrient reservoir activity	molecular_function	23	23/2361	40	40/1938	34	34/4159
GO:0016209	antioxidant activity	molecular_function	23	23/2361	12	12/1938	38	38/4159
GO:0045182	translation regulator activity	molecular_function	9	9/2361	14	14/1938	17	17/4159
GO:0060089	molecular transducer activity	molecular_function	34	34/2361	18	18/1938	73	73/4159
GO:0140110	transcription regulator activity	molecular_function	97	97/2361	83	83/1938	194	194/4159
GO:0140299	small molecule sensor activity	molecular_function	0	0	0	0	3	3/4159
GO:0044183	protein folding chaperone	molecular_function	2	2/2361	4	4/1938	4	4/4159

## Sheet: kegg pathway
Num	Pathway id	Description	Database	Ratio_in_study	Ratio_in_pop	Pvalue	Padjust	First Category	Second Category
19	map00941	Flavonoid biosynthesis	KEGG PATHWAY	19/854	84/13607	7.96077e-07	8.91606e-05	Metabolism	Biosynthesis of other secondary metabolites
40	map00940	Phenylpropanoid biosynthesis	KEGG PATHWAY	40/854	369/13607	0.000506952	0.0283893	Metabolism	Biosynthesis of other secondary metabolites
5	map00944	Flavone and flavonol biosynthesis	KEGG PATHWAY	5/854	18/13607	0.0041488	0.154889	Metabolism	Biosynthesis of other secondary metabolites
37	map04626	Plant-pathogen interaction	KEGG PATHWAY	37/854	404/13607	0.0133164	0.18643	Organismal Systems	Environmental adaptation
19	map00480	Glutathione metabolism	KEGG PATHWAY	19/854	174/13607	0.0130258	0.208413	Metabolism	Metabolism of other amino acids
7	map00790	Folate biosynthesis	KEGG PATHWAY	7/854	40/13607	0.0113206	0.211318	Metabolism	Metabolism of cofactors and vitamins
12	map00052	Galactose metabolism	KEGG PATHWAY	12/854	87/13607	0.00793292	0.222122	Metabolism	Carbohydrate metabolism
2	map00942	Anthocyanin biosynthesis	KEGG PATHWAY	2/854	3/13607	0.0113113	0.253374	Metabolism	Biosynthesis of other secondary metabolites
13	map00561	Glycerolipid metabolism	KEGG PATHWAY	13/854	114/13607	0.0262982	0.29454	Metabolism	Lipid metabolism
33	map04075	Plant hormone signal transduction	KEGG PATHWAY	33/854	373/13607	0.0289789	0.295058	Environmental Information Processing	Signal transduction
9	map00250	Alanine, aspartate and glutamate metabolism	KEGG PATHWAY	9/854	68/13607	0.0256262	0.318903	Metabolism	Amino acid metabolism
8	map00360	Phenylalanine metabolism	KEGG PATHWAY	8/854	64/13607	0.0459656	0.429012	Metabolism	Amino acid metabolism
4	map00430	Taurine and hypotaurine metabolism	KEGG PATHWAY	4/854	23/13607	0.0525824	0.453017	Metabolism	Metabolism of other amino acids
6	map00073	Cutin, suberine and wax biosynthesis	KEGG PATHWAY	6/854	46/13607	0.066233	0.463631	Metabolism	Lipid metabolism
3	map04122	Sulfur relay system	KEGG PATHWAY	3/854	16/13607	0.0748406	0.465675	Genetic Information Processing	Folding, sorting and degradation
24	map00500	Starch and sucrose metabolism	KEGG PATHWAY	24/854	275/13607	0.0635741	0.474686	Metabolism	Carbohydrate metabolism
5	map00905	Brassinosteroid biosynthesis	KEGG PATHWAY	5/854	36/13607	0.0723657	0.476762	Metabolism	Metabolism of terpenoids and polyketides
4	map00590	Arachidonic acid metabolism	KEGG PATHWAY	4/854	24/13607	0.0600862	0.48069	Metabolism	Lipid metabolism
9	map00460	Cyanoamino acid metabolism	KEGG PATHWAY	9/854	86/13607	0.0896327	0.528361	Metabolism	Metabolism of other amino acids
9	map00592	alpha-Linolenic acid metabolism	KEGG PATHWAY	9/854	91/13607	0.11675	0.622666	Metabolism	Lipid metabolism
7	map00061	Fatty acid biosynthesis	KEGG PATHWAY	7/854	65/13607	0.111795	0.62605	Metabolism	Lipid metabolism
7	map02010	ABC transporters	KEGG PATHWAY	7/854	67/13607	0.125831	0.640594	Environmental Information Processing	Membrane transport
14	map00564	Glycerophospholipid metabolism	KEGG PATHWAY	14/854	161/13607	0.13485	0.656662	Metabolism	Lipid metabolism
6	map01040	Biosynthesis of unsaturated fatty acids	KEGG PATHWAY	6/854	57/13607	0.145946	0.681081	Metabolism	Lipid metabolism
2	map00603	Glycosphingolipid biosynthesis - globo and isoglobo series	KEGG PATHWAY	2/854	15/13607	0.241835	0.752376	Metabolism	Glycan biosynthesis and metabolism
3	map00780	Biotin metabolism	KEGG PATHWAY	3/854	27/13607	0.238482	0.763142	Metabolism	Metabolism of cofactors and vitamins
6	map00410	beta-Alanine metabolism	KEGG PATHWAY	6/854	66/13607	0.232493	0.765859	Metabolism	Metabolism of other amino acids
1	map00998	Biosynthesis of various secondary metabolites - part 2	KEGG PATHWAY	1/854	4/13607	0.228409	0.775207	Metabolism	Biosynthesis of other secondary metabolites
4	map00640	Propanoate metabolism	KEGG PATHWAY	4/854	39/13607	0.227183	0.795139	Metabolism	Carbohydrate metabolism
4	map00960	Tropane, piperidine and pyridine alkaloid biosynthesis	KEGG PATHWAY	4/854	38/13607	0.21363	0.797554	Metabolism	Biosynthesis of other secondary metabolites
3	map00760	Nicotinate and nicotinamide metabolism	KEGG PATHWAY	3/854	26/13607	0.221513	0.800306	Metabolism	Metabolism of cofactors and vitamins
4	map00650	Butanoate metabolism	KEGG PATHWAY	4/854	37/13607	0.200314	0.801257	Metabolism	Carbohydrate metabolism
2	map00440	Phosphonate and phosphinate metabolism	KEGG PATHWAY	2/854	13/13607	0.194547	0.807009	Metabolism	Metabolism of other amino acids
6	map00400	Phenylalanine, tyrosine and tryptophan biosynthesis	KEGG PATHWAY	6/854	64/13607	0.211962	0.818612	Metabolism	Amino acid metabolism
5	map00510	N-Glycan biosynthesis	KEGG PATHWAY	5/854	49/13607	0.191934	0.826791	Metabolism	Glycan biosynthesis and metabolism
4	map00220	Arginine biosynthesis	KEGG PATHWAY	4/854	43/13607	0.28323	0.834782	Metabolism	Amino acid metabolism
8	map00053	Ascorbate and aldarate metabolism	KEGG PATHWAY	8/854	88/13607	0.186672	0.836292	Metabolism	Carbohydrate metabolism
9	map00630	Glyoxylate and dicarboxylate metabolism	KEGG PATHWAY	9/854	113/13607	0.278446	0.842865	Metabolism	Carbohydrate metabolism
5	map00860	Porphyrin and chlorophyll metabolism	KEGG PATHWAY	5/854	58/13607	0.298734	0.857902	Metabolism	Metabolism of cofactors and vitamins
6	map00030	Pentose phosphate pathway	KEGG PATHWAY	6/854	76/13607	0.342202	0.934795	Metabolism	Carbohydrate metabolism
14	map00010	Glycolysis / Gluconeogenesis	KEGG PATHWAY	14/854	195/13607	0.340484	0.953356	Metabolism	Carbohydrate metabolism
12	map03010	Ribosome	KEGG PATHWAY	12/854	441/13607	0.999834	0.999834	Genetic Information Processing	Translation
3	map00950	Isoquinoline alkaloid biosynthesis	KEGG PATHWAY	3/854	35/13607	0.37809	1	Metabolism	Biosynthesis of other secondary metabolites
18	map04016	MAPK signaling pathway - plant	KEGG PATHWAY	18/854	264/13607	0.39269	1	Environmental Information Processing	Signal transduction
5	map00062	Fatty acid elongation	KEGG PATHWAY	5/854	66/13607	0.399823	1	Metabolism	Lipid metabolism
3	map00770	Pantothenate and CoA biosynthesis	KEGG PATHWAY	3/854	38/13607	0.429715	1	Metabolism	Metabolism of cofactors and vitamins
5	map00071	Fatty acid degradation	KEGG PATHWAY	5/854	69/13607	0.437635	1	Metabolism	Lipid metabolism
15	map00520	Amino sugar and nucleotide sugar metabolism	KEGG PATHWAY	15/854	226/13607	0.449791	1	Metabolism	Carbohydrate metabolism
4	map00350	Tyrosine metabolism	KEGG PATHWAY	4/854	56/13607	0.470314	1	Metabolism	Amino acid metabolism
2	map00740	Riboflavin metabolism	KEGG PATHWAY	2/854	26/13607	0.491996	1	Metabolism	Metabolism of cofactors and vitamins
15	map04144	Endocytosis	KEGG PATHWAY	15/854	233/13607	0.497984	1	Cellular Processes	Transport and catabolism
8	map03008	Ribosome biogenesis in eukaryotes	KEGG PATHWAY	8/854	122/13607	0.501701	1	Genetic Information Processing	Translation
1	map00604	Glycosphingolipid biosynthesis - ganglio series	KEGG PATHWAY	1/854	11/13607	0.509959	1	Metabolism	Glycan biosynthesis and metabolism
5	map00130	Ubiquinone and other terpenoid-quinone biosynthesis	KEGG PATHWAY	5/854	75/13607	0.511288	1	Metabolism	Metabolism of cofactors and vitamins
6	map00195	Photosynthesis	KEGG PATHWAY	6/854	97/13607	0.574533	1	Metabolism	Energy metabolism
3	map00910	Nitrogen metabolism	KEGG PATHWAY	3/854	48/13607	0.587341	1	Metabolism	Energy metabolism
7	map04070	Phosphatidylinositol signaling system	KEGG PATHWAY	7/854	116/13607	0.597882	1	Environmental Information Processing	Signal transduction
1	map00903	Limonene and pinene degradation	KEGG PATHWAY	1/854	15/13607	0.621971	1	Metabolism	Metabolism of terpenoids and polyketides
2	map00591	Linoleic acid metabolism	KEGG PATHWAY	2/854	34/13607	0.638649	1	Metabolism	Lipid metabolism
7	map00620	Pyruvate metabolism	KEGG PATHWAY	7/854	121/13607	0.642501	1	Metabolism	Carbohydrate metabolism
4	map00904	Diterpenoid biosynthesis	KEGG PATHWAY	4/854	70/13607	0.647908	1	Metabolism	Metabolism of terpenoids and polyketides
5	map00051	Fructose and mannose metabolism	KEGG PATHWAY	5/854	89/13607	0.664314	1	Metabolism	Carbohydrate metabolism
3	map00908	Zeatin biosynthesis	KEGG PATHWAY	3/854	54/13607	0.667409	1	Metabolism	Metabolism of terpenoids and polyketides
4	map00020	Citrate cycle (TCA cycle)	KEGG PATHWAY	4/854	74/13607	0.690744	1	Metabolism	Carbohydrate metabolism
3	map04136	Autophagy - other	KEGG PATHWAY	3/854	56/13607	0.691435	1	Cellular Processes	Transport and catabolism
3	map00100	Steroid biosynthesis	KEGG PATHWAY	3/854	56/13607	0.691435	1	Metabolism	Lipid metabolism
7	map00710	Carbon fixation in photosynthetic organisms	KEGG PATHWAY	7/854	128/13607	0.699858	1	Metabolism	Energy metabolism
5	map00240	Pyrimidine metabolism	KEGG PATHWAY	5/854	93/13607	0.701801	1	Metabolism	Nucleotide metabolism
3	map04712	Circadian rhythm - plant	KEGG PATHWAY	3/854	59/13607	0.724984	1	Organismal Systems	Environmental adaptation
5	map00260	Glycine, serine and threonine metabolism	KEGG PATHWAY	5/854	96/13607	0.727944	1	Metabolism	Amino acid metabolism
8	map03018	RNA degradation	KEGG PATHWAY	8/854	155/13607	0.764406	1	Genetic Information Processing	Folding, sorting and degradation
2	map00600	Sphingolipid metabolism	KEGG PATHWAY	2/854	44/13607	0.772661	1	Metabolism	Lipid metabolism
1	map00670	One carbon pool by folate	KEGG PATHWAY	1/854	23/13607	0.77509	1	Metabolism	Metabolism of cofactors and vitamins
2	map00513	Various types of N-glycan biosynthesis	KEGG PATHWAY	2/854	45/13607	0.783345	1	Metabolism	Glycan biosynthesis and metabolism
1	map00730	Thiamine metabolism	KEGG PATHWAY	1/854	24/13607	0.78923	1	Metabolism	Metabolism of cofactors and vitamins
1	map04933	AGE-RAGE signaling pathway in diabetic complications	KEGG PATHWAY	1/854	25/13607	0.802482	1	Human Diseases	Endocrine and metabolic disease
2	map00906	Carotenoid biosynthesis	KEGG PATHWAY	2/854	48/13607	0.812789	1	Metabolism	Metabolism of terpenoids and polyketides
1	map00531	Glycosaminoglycan degradation	KEGG PATHWAY	1/854	26/13607	0.814901	1	Metabolism	Glycan biosynthesis and metabolism
2	map04130	SNARE interactions in vesicular transport	KEGG PATHWAY	2/854	49/13607	0.82178	1	Genetic Information Processing	Folding, sorting and degradation
5	map00380	Tryptophan metabolism	KEGG PATHWAY	5/854	111/13607	0.833858	1	Metabolism	Amino acid metabolism
1	map00450	Selenocompound metabolism	KEGG PATHWAY	1/854	29/13607	0.847672	1	Metabolism	Metabolism of other amino acids
1	map00340	Histidine metabolism	KEGG PATHWAY	1/854	31/13607	0.866232	1	Metabolism	Amino acid metabolism
3	map00970	Aminoacyl-tRNA biosynthesis	KEGG PATHWAY	3/854	77/13607	0.869661	1	Genetic Information Processing	Translation
2	map03410	Base excision repair	KEGG PATHWAY	2/854	57/13607	0.880789	1	Genetic Information Processing	Replication and repair
2	map00920	Sulfur metabolism	KEGG PATHWAY	2/854	57/13607	0.880789	1	Metabolism	Energy metabolism
1	map00511	Other glycan degradation	KEGG PATHWAY	1/854	33/13607	0.882532	1	Metabolism	Glycan biosynthesis and metabolism
1	map00563	Glycosylphosphatidylinositol (GPI)-anchor biosynthesis	KEGG PATHWAY	1/854	33/13607	0.882532	1	Metabolism	Glycan biosynthesis and metabolism
5	map00040	Pentose and glucuronate interconversions	KEGG PATHWAY	5/854	122/13607	0.887945	1	Metabolism	Carbohydrate metabolism
4	map00562	Inositol phosphate metabolism	KEGG PATHWAY	4/854	105/13607	0.902548	1	Metabolism	Carbohydrate metabolism
5	map04146	Peroxisome	KEGG PATHWAY	5/854	127/13607	0.90705	1	Cellular Processes	Transport and catabolism
2	map00310	Lysine degradation	KEGG PATHWAY	2/854	64/13607	0.917029	1	Metabolism	Amino acid metabolism
2	map03022	Basal transcription factors	KEGG PATHWAY	2/854	68/13607	0.932801	1	Genetic Information Processing	Transcription
5	map00230	Purine metabolism	KEGG PATHWAY	5/854	136/13607	0.934352	1	Metabolism	Nucleotide metabolism
2	map00280	Valine, leucine and isoleucine degradation	KEGG PATHWAY	2/854	70/13607	0.939579	1	Metabolism	Amino acid metabolism
6	map00270	Cysteine and methionine metabolism	KEGG PATHWAY	6/854	160/13607	0.94141	1	Metabolism	Amino acid metabolism
1	map00945	Stilbenoid, diarylheptanoid and gingerol biosynthesis	KEGG PATHWAY	1/854	46/13607	0.949548	1	Metabolism	Biosynthesis of other secondary metabolites
3	map00330	Arginine and proline metabolism	KEGG PATHWAY	3/854	101/13607	0.956903	1	Metabolism	Amino acid metabolism
2	map03050	Proteasome	KEGG PATHWAY	2/854	79/13607	0.962809	1	Genetic Information Processing	Folding, sorting and degradation
3	map04145	Phagosome	KEGG PATHWAY	3/854	121/13607	0.983977	1	Cellular Processes	Transport and catabolism
1	map03020	RNA polymerase	KEGG PATHWAY	1/854	64/13607	0.984366	1	Genetic Information Processing	Transcription
1	map03430	Mismatch repair	KEGG PATHWAY	1/854	65/13607	0.985352	1	Genetic Information Processing	Replication and repair
2	map03440	Homologous recombination	KEGG PATHWAY	2/854	96/13607	0.985495	1	Genetic Information Processing	Replication and repair
4	map03015	mRNA surveillance pathway	KEGG PATHWAY	4/854	151/13607	0.987392	1	Genetic Information Processing	Translation
1	map03060	Protein export	KEGG PATHWAY	1/854	71/13607	0.990091	1	Genetic Information Processing	Folding, sorting and degradation
1	map00900	Terpenoid backbone biosynthesis	KEGG PATHWAY	1/854	71/13607	0.990091	1	Metabolism	Metabolism of terpenoids and polyketides
8	map03040	Spliceosome	KEGG PATHWAY	8/854	251/13607	0.990729	1	Genetic Information Processing	Transcription
6	map00190	Oxidative phosphorylation	KEGG PATHWAY	6/854	212/13607	0.992989	1	Metabolism	Energy metabolism
1	map03030	DNA replication	KEGG PATHWAY	1/854	83/13607	0.995468	1	Genetic Information Processing	Replication and repair
10	map04141	Protein processing in endoplasmic reticulum	KEGG PATHWAY	10/854	316/13607	0.995863	1	Genetic Information Processing	Folding, sorting and degradation
6	map03013	RNA transport	KEGG PATHWAY	6/854	229/13607	0.996712	1	Genetic Information Processing	Translation
1	map03420	Nucleotide excision repair	KEGG PATHWAY	1/854	102/13607	0.998689	1	Genetic Information Processing	Replication and repair
3	map04120	Ubiquitin mediated proteolysis	KEGG PATHWAY	3/854	194/13607	0.999683	1	Genetic Information Processing	Folding, sorting and degradation
